# Supplementary material
Source: publisher figshare collection journal article supplement (https://gsapubs.figshare.com/ndownloader/files/23293244)
Supplement: Supplementary file 1 [file 23293244]

**Tectonic categorization criteria**

TABLE DR1. SUMMARY OF CRITERIA USED TO CATEGORISE INTERPRETATIONS INTO THE DIFFERENT TECTONIC SETTINGS

| <b>Tectonic Category</b> | <b>Criteria for categorization</b>                                                                                                                                                                                                                                                                                                                                                                                                                                                                                                                                                                                 |
|--------------------------|--------------------------------------------------------------------------------------------------------------------------------------------------------------------------------------------------------------------------------------------------------------------------------------------------------------------------------------------------------------------------------------------------------------------------------------------------------------------------------------------------------------------------------------------------------------------------------------------------------------------|
| Extension                | <ul style="list-style-type: none"> <li>• Arrow next to a fault with arrowhead pointing down (or on both sides with appropriate kinematics).</li> <li>• Correlated horizons showing extensional offsets. Horizons were classified as correlated if they shared colouring, shading of a sedimentary package, numbering/lettering or written annotations.</li> <li>• Annotations denoting extension i.e. "normal fault".</li> <li>• Descriptive writing and/or evolutionary sketches showing extension.</li> </ul>                                                                                                    |
| Inversion                | <ul style="list-style-type: none"> <li>• Double headed arrow next to fault denoting both extension and compression accommodated on a single fault.</li> <li>• As point 1, but extension and compression could be accommodated on different faults across the image.</li> <li>• Correlated horizons showing both extensional offsets and contraction.</li> <li>• A correlated horizon being above and below the regional datum.</li> <li>• Annotations denoting inversion i.e. "reactivation of fault in opposite sense".</li> <li>• Descriptive writing and/or evolutionary sketches showing inversion.</li> </ul> |
| Thrust                   | <ul style="list-style-type: none"> <li>• Arrow next to a fault with arrowhead pointing up.</li> <li>• Correlated horizons showing compressional offsets.</li> <li>• Annotations denoting compression i.e. "reverse fault".</li> <li>• Descriptive writing and/or evolutionary sketches showing compression.</li> </ul>                                                                                                                                                                                                                                                                                             |
| Strike-slip              | <ul style="list-style-type: none"> <li>• Flower structure geometry (steep faults splaying upwards).</li> <li>• Symbol showing head (circle with dot) and tail (circle with cross) of a dart on either side of a fault. (n.b. none of the participants used this symbol).</li> <li>• Descriptive writing and/or evolutionary sketches showing strike slip faulting n.b. only those interpretations that unequivocally showed a flower structure were categorized as strike-slip, if they did not, they were categorized as unclear.</li> </ul>                                                                      |
| Diapirism                | <ul style="list-style-type: none"> <li>• Colouring or stippling to represent salt (e.g. inverted 'V's) or shale.</li> <li>• Annotations denoting salt or shale mobilization i.e. "salt diapir"</li> <li>• Descriptive writing and/or evolutionary sketches showing diapirs of salt or shale</li> </ul>                                                                                                                                                                                                                                                                                                             |
| Other                    | <ul style="list-style-type: none"> <li>• Non-tectonic interpretation, for instance sequence stratigraphy or coral reefs</li> </ul>                                                                                                                                                                                                                                                                                                                                                                                                                                                                                 |
